# Supplementary material for: Seroconversion of a Swine Herd in a Free-Range Rural Multi-Species Farm against HPAI H5N1 2.3.4.4b Clade Virus
Source: MDPI journal article supplement (doi:10.3390/microorganisms11051162), 2023-04-28
Supplement: s1 [file s1]

Supplementary table 1 – Serological data testing swine sera by the HI, MN and ELISA assays.

|  |          |                                          | HI assay                           |                                      |                               |                                        |                                   | MN assay                       |  |
|--|----------|------------------------------------------|------------------------------------|--------------------------------------|-------------------------------|----------------------------------------|-----------------------------------|--------------------------------|--|
|  | Serum ID | Anti-NP<br>ELISA (S/N<br>%) <sup>a</sup> | H1N1<br>sw/IT/6831<br>(avian-like) | H1N2<br>sw/IT/166853<br>(human-like) | H1N1 Italy/2810<br>(pandemic) | H3N2<br>sw/IT/8088<br>(human-<br>like) | H5N1 ew/IT<br>(clade<br>2.3.4.4b) | H5N1 ew/IT<br>(clade 2.3.4.4b) |  |
|  | 9437/1   | 31,8                                     | NEG <sup>b</sup>                   | NEG                                  | NEG                           | NEG                                    | NEG                               | N.D. <sup>c</sup>              |  |
|  | 9437/2   | 14,9                                     | NEG                                | NEG                                  | NEG                           | NEG                                    | NEG                               | N.D.                           |  |
|  | 9437/3   | 19,5                                     | NEG                                | NEG                                  | NEG                           | NEG                                    | NEG                               | N.D.                           |  |
|  | 9437/5   | 6,1                                      | NEG                                | 1:80                                 | NEG                           | NEG                                    | 1:320                             | 1:320                          |  |
|  | 9437/6   | 39,2                                     | NEG                                | NEG                                  | NEG                           | NEG                                    | NEG                               | N.D.                           |  |
|  | 9437/7   | 10,1                                     | NEG                                | 1:20                                 | NEG                           | NEG                                    | 1:20                              | N.D.                           |  |
|  | 9503/1   | 20,1                                     | NEG                                | 1:80                                 | NEG                           | NEG                                    | 1:160                             | 1:160                          |  |
|  | 9503/4   | 11,1                                     | NEG                                | NEG                                  | NEG                           | NEG                                    | 1:20                              | N.D.                           |  |
|  | 9503/5   | 9,6                                      | NEG                                | NEG                                  | NEG                           | NEG                                    | NEG                               | N.D.                           |  |
|  | 9503/7   | 5,8                                      | NEG                                | NEG                                  | NEG                           | NEG                                    | NEG                               | N.D.                           |  |
|  | 9503/8   | 20,1                                     | NEG                                | NEG                                  | NEG                           | NEG                                    | 1:640                             | 1:320                          |  |
|  | 9503/9   | 31,3                                     | NEG                                | NEG                                  | NEG                           | NEG                                    | NEG                               | N.D.                           |  |
|  | 9503/11  | 22,8                                     | NEG                                | NEG                                  | NEG                           | NEG                                    | NEG                               | N.D.                           |  |
|  | 9503/12  | 5,2                                      | NEG                                | 1:80                                 | NEG                           | NEG                                    | 1:40                              | N.D.                           |  |
|  | 9503/13  | 10,9                                     | NEG                                | 1:20                                 | NEG                           | NEG                                    | 1:80                              | N.D.                           |  |
|  | 9503/15  | 5                                        | NEG                                | NEG                                  | NEG                           | NEG                                    | NEG                               | N.D.                           |  |
|  | 9503/17  | 23,9                                     | NEG                                | NEG                                  | NEG                           | NEG                                    | 1:40                              | N.D.                           |  |
|  | 9503/18  | 21,4                                     | NEG                                | NEG                                  | NEG                           | NEG                                    | 1:80                              | N.D.                           |  |
|  | 9503/20  | 7,9                                      | NEG                                | NEG                                  | NEG                           | NEG                                    | 1:320                             | 1:320                          |  |
|  | 9503/21  | 17,3                                     | NEG                                | 1:320                                | NEG                           | NEG                                    | 1:320                             | 1:640                          |  |
|  | 9503/22  | 21,5                                     | NEG                                | NEG                                  | NEG                           | NEG                                    | 1:40                              | N.D.                           |  |
|  | 9503/23  | 7,8                                      | NEG                                | NEG                                  | NEG                           | NEG                                    | 1:1280                            | 1:320                          |  |
|  | 9503/24  | 16,9                                     | NEG                                | NEG                                  | NEG                           | NEG                                    | 1:180                             | N.D.                           |  |
|  | 9503/25  | 20,8                                     | NEG                                | NEG                                  | NEG                           | NEG                                    | 1:10                              | N.D.                           |  |
|  | 9503/26  | 10,3                                     | NEG                                | NEG                                  | NEG                           | NEG                                    | 1:80                              | N.D.                           |  |
|  | 9503/29  | 37,1                                     | NEG                                | NEG                                  | NEG                           | NEG                                    | NEG                               | N.D.                           |  |
|  | 9503/30  | 42,5                                     | NEG                                | NEG                                  | NEG                           | NEG                                    | 1:10                              | N.D.                           |  |
|  | 9503/34  | 16,2                                     | NEG                                | NEG                                  | NEG                           | NEG                                    | NEG                               | N.D.                           |  |
|  | 9503/35  | 37,1                                     | NEG                                | NEG                                  | NEG                           | NEG                                    | NEG                               | N.D.                           |  |
|  | 9503/36  | 6,5                                      | NEG                                | NEG                                  | NEG                           | NEG                                    | 1:640                             | 1:320                          |  |
|  | 9503/37  | 5                                        | NEG                                | NEG                                  | NEG                           | NEG                                    | 1:20                              | N.D.                           |  |
|  | 9503/38  | 9,7                                      | NEG                                | NEG                                  | NEG                           | NEG                                    | 1:80                              | N.D.                           |  |
|  | 9503/40  | 5,4                                      | NEG                                | NEG                                  | NEG                           | NEG                                    | 1:160                             | 1:160                          |  |
|  | 9503/42  | 14,7                                     | NEG                                | NEG                                  | NEG                           | NEG                                    | 1:10                              | N.D.                           |  |
|  | 9503/43  | 15,1                                     | NEG                                | NEG                                  | NEG                           | NEG                                    | 1:640                             | 1:640                          |  |
|  | 9503/44  | 4,8                                      | NEG                                | NEG                                  | NEG                           | NEG                                    | NEG                               | N.D.                           |  |
|  | 9503/45  | 15,7                                     | NEG                                | NEG                                  | NEG                           | NEG                                    | NEG                               | N.D.                           |  |
|  | 9503/46  | 8                                        | NEG                                | NEG                                  | NEG                           | NEG                                    | 1:40                              | N.D.                           |  |
|  | 9503/47  | 20,9                                     | NEG                                | NEG                                  | NEG                           | NEG                                    | 1:20                              | N.D.                           |  |
|  | 9503/49  | 8,3                                      | NEG                                | NEG                                  | NEG                           | NEG                                    | NEG                               | N.D.                           |  |
|  | 9503/50  | 11,8                                     | NEG                                | 1:320                                | NEG                           | NEG                                    | NEG                               | N.D.                           |  |
|  | 9503/51  | 5,3                                      | NEG                                | NEG                                  | NEG                           | NEG                                    | NEG                               | N.D.                           |  |
|  | 9503/52  | 10,3                                     | NEG                                | NEG                                  | NEG                           | NEG                                    | NEG                               | N.D.                           |  |
|  | 9503/53  | 7                                        | NEG                                | NEG                                  | NEG                           | NEG                                    | NEG                               | N.D.                           |  |
|  | 9503/54  | 16,1                                     | NEG                                | NEG                                  | NEG                           | NEG                                    | 1:20                              | N.D.                           |  |
|  | 9503/55  | 16,8                                     | NEG                                | NEG                                  | NEG                           | NEG                                    | 1:20                              | N.D.                           |  |
|  | 9503/58  | 15,7                                     | NEG                                | 1:20                                 | NEG                           | NEG                                    | 1:20                              | N.D.                           |  |
|  | 9503/59  | 11,4                                     | NEG                                | 1:20                                 | NEG                           | NEG                                    | 1:20                              | N.D.                           |  |
|  | 9503/60  | 10,4                                     | NEG                                | 1:20                                 | NEG                           | NEG                                    | 1:20                              | N.D.                           |  |

a Positive S/N% values  $\leq 45$ , doubtful values in the range 45-50, negative values  $>50$ .

b NEG: titers  $<1:10$

c N.D.: not done
